# Supplementary material for: A set of manganese ion activated fluoride phosphors (A2BF6:Mn4+, A = K, Na, B = Si, Ge, Ti): synthesis below 0 °C and efficient room-temperature photoluminescence
Source: Royal Society of Chemistry journal article supplement (doi:10.1039/c6tc02737g), 2016-01-01
Supplement: c6tc02737g1.pdf [file c6tc02737g1.pdf]

## Supporting information of

Set of manganese ions activated fluoride phosphors ( $A_2BF_6:Mn^{4+}$ , A=K, Na, B=Si, Ge, Ti): Synthesis below 0 °C and efficient room-temperature photoluminescence

Fei Tang,<sup>a</sup> Zhicheng Su,<sup>a</sup> Honggang Ye,<sup>a</sup> Mingzheng Wang,<sup>a</sup> Xin Lan,<sup>b</sup> David Lee Phillips,<sup>b</sup> Yongge Cao,<sup>c</sup> and Shijie Xu<sup>a\*</sup>

<sup>a</sup>Department of Physics, and Shenzhen Institute of Research and Innovation (SIRI), The University of Hong Kong, China

<sup>b</sup>Department of Chemistry, The University of Hong Kong, China

<sup>c</sup>Department of Physics, Renmin University of China, Beijing 100872, China

**Table s1** Specific information of the raw materials used in our synthesis experiment.

| Raw materials                   | Source                            | Grade                                                | Function                |
|---------------------------------|-----------------------------------|------------------------------------------------------|-------------------------|
| HF                              | Aladdin Chemistry Co.,<br>China   | 49wt.% in H <sub>2</sub> O,<br>99.99998% metal basis | Solvent,<br>Reactant    |
| KHF <sub>2</sub>                | Aikeshiji Chemistry<br>Co., China | AR, 99%                                              | Reactant,<br>Catalyzer  |
| NaHF <sub>2</sub>               | Aikeshiji Chemistry<br>Co., China | 98%                                                  | Reactant,<br>Catalyzer  |
| KMnO <sub>4</sub>               | Guanchen Co. China                | 99.3%                                                | Reactant,<br>Oxidizer   |
| H <sub>2</sub> O <sub>2</sub>   | Aladdin Chemistry Co.,<br>China   | AR, 30wt.% in H <sub>2</sub> O                       | Reactant,<br>deoxidizer |
| K <sub>2</sub> TiF <sub>6</sub> | Aladdin Chemistry Co.,<br>China   | AR, 99.5%                                            | Reactant,<br>Ti source  |
| H <sub>2</sub> SiF <sub>6</sub> | Aladdin Chemistry Co.,<br>China   | GR, 30-32wt.%                                        | Reactant,<br>Si source  |
| GeO <sub>2</sub>                | Aladdin Chemistry Co.,<br>China   | 99.99% metal basis,<br>>200 mesh                     | Reactant,<br>Ge source  |

**Table s2** Energetic positions of the ZPL lines and the major phonon sidebands in the PL spectra of the synthesized phosphors.

| Fluorides                                          | ZPL(eV) | Phonon sideband1 |         | Phonon sideband2 |         | Phonon sideband3 |         |
|----------------------------------------------------|---------|------------------|---------|------------------|---------|------------------|---------|
|                                                    |         | S.               | Anti-S. | S.               | Anti-S. | S.               | Anti-S. |
| K <sub>2</sub> TiF <sub>6</sub> :Mn <sup>4+</sup>  | 1.9916  | 1.9637           | 2.0182  | 1.9489           | 2.0333  | 1.9133           | 2.0643  |
| K <sub>2</sub> GeF <sub>6</sub> :Mn <sup>4+</sup>  | 1.9945  | 1.9657           | 2.0205  | 1.9521           | 2.0365  | 1.9138           | 2.0701  |
| K <sub>2</sub> SiF <sub>6</sub> :Mn <sup>4+</sup>  | 1.9954  | 1.9664           | 2.0226  | 1.9531           | 2.0375  | 1.9154           | 2.0746  |
| Na <sub>2</sub> SiF <sub>6</sub> :Mn <sup>4+</sup> | 2.0072  | 1.9772           | 2.0362  | 1.9648           | 2.0505  | 1.9285           | 2.0859  |

Noted that “S.” denotes the peak positions of the Stokes phonon sidebands, while “Anti-S.” represents the peak positions of the anti-Stokes bands.

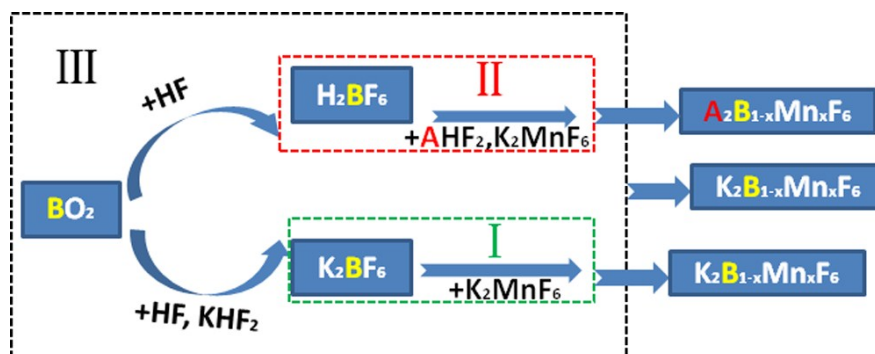

**Figure s1.** A schematic diagram showing the three synthesizing schemes in the preparation of red phosphors: I for synthesizing KTFM; II for both KSFM and NaSFM; III for KGFM.

**Figure s1** depicts the three synthesizing schemes for the fluoride phosphors based on the B compounds. In scheme I,  $\text{K}_2\text{BF}_6$  compound is directly adopted to react with  $\text{K}_2\text{MnF}_6$  via the cation exchange between  $\text{B}^{4+}$  and  $\text{Mn}^{4+}$ . In scheme II,  $\text{H}_2\text{BF}_6$  solution is used to react with the admixture of  $\text{K}_2\text{MnF}_6$  and  $\text{AHF}_2$ . Being different from the cation exchange reaction, this kind of reaction directly produces the final product via no generation of  $\text{K}_2\text{BF}_6$  compound. In synthesizing scheme III, the oxide of  $\text{BO}_2$  is employed as B source materials, which could be the most complex one since the two above-described reaction mechanisms may simultaneously occur in it, leading to the generation of two different hexagonal phases during this process.

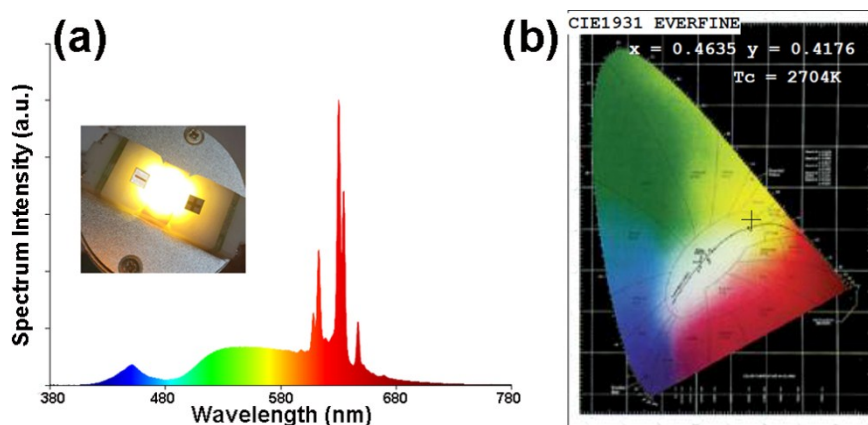

**Figure s2.** (a) Luminescence spectrum of a warm white LED prepared with the admixture of the KSFM red phosphor and the commercial YAG:Ce<sup>3+</sup> yellow phosphor plus a 450 nm InGaN/GaN blue LED. The inset is a photo of the warm white LED; (b) The chromaticity coordinates of the LED with CCT of 2704 K at the position of (0.4635, 0.4176).

**Figure s2(a)** illustrates the full color luminescence spectrum of a warm white LED

device at room temperature, which is prepared with a 450 nm InGaN/GaN blue LED + a coating layer of the mixed phosphor of red KSFM and yellow YAG:Ce<sup>3+</sup>. The inset figure is a photon of the warm white LED with a color coordination of (0.4635, 0.4176) shown in **Figure s2(b)**. The warm white light of the composite LED possesses a low correlated color temperature (CCT) of 2704 K and a high color render index (CRI) of 81.2. And its luminous efficiency is as high as 122 lm/W. These good properties indicate a promising application of our phosphors in the back-light displaying and indoor lighting fields.
